# Supplementary material
Source: publisher figshare collection journal article supplement (https://tandf.figshare.com/ndownloader/files/30925689)
Supplement: Supplementary file 1 [file 30925689]

Archive with 3 entries (3 files):
- Supplementary Materials for Review/Code_and_Data_Download_Links.pdf
- Supplementary Materials for Review/READ ME.txt
- Supplementary Materials for Review/Supplemental_Materials.pdf
