# Supplementary material
Source: publisher figshare collection journal article supplement (https://tandf.figshare.com/ndownloader/files/30925689)
Supplement: Supplementary file 1 [file 30925689 › Supplementary Materials for Review/Code_and_Data_Download_Links.pdf]

**Link to Matlab and R code used in Section 3 of “Bayesian Hierarchical Models with Conjugate Full-Conditional Distributions for Dependent Data from the Natural Exponential Family” by J. R. Bradley, S. H. Holan, and C. K. Wikle.**

Please click on the following link to download a zip file containing the code used in Section 3 of “Bayesian Hierarchical Models with Conjugate Full-Conditional Distributions for Dependent Data from the Natural Exponential Family” by J. R. Bradley, S. H. Holan, and C. K. Wikle. Those interested in reproducing the results can run the code, and those interested in using the LCM for their problems can adapt the code to their setting. Please read the “Read Me.txt” files for details on how to run the code.

[https://drive.google.com/open?id=1IOLjyVLZp\\_Maz5IHw0i4sbJrQwYxx7aT](https://drive.google.com/open?id=1IOLjyVLZp_Maz5IHw0i4sbJrQwYxx7aT)

There are many Matlab and R scripts used to reproduce the results in Section 3. To aid the reader in implementing the LCM we have also provided more user-friendly R code at: <https://github.com/JonathanBradley28/CM>.
