# Supplementary material
Source: publisher figshare collection journal article supplement (https://tandf.figshare.com/ndownloader/files/30925689)
Supplement: Supplementary file 1 [file 30925689 › Supplementary Materials for Review/READ ME.txt]

The document "Supplemental_Materials.pdf" contains the Supplemental Materials referenced in the paper, "Bayesian Hierarchical Models with Conjugate Full-Conditional Distributions for Dependent Data from the Natural Exponential Family," by J.R. Bradley, S.H. Holan, and C.K. Wikle.

The document "Code_and_Data_Download_Links.pdf" contains a link to the data and code used in the paper, "Bayesian Hierarchical Models with Conjugate Full-Conditional Distributions for Dependent Data from the Natural Exponential Family," by J.R. Bradley, S.H. Holan, and C.K. Wikle.
